# Supplementary material for: Novel benzo[b]thieno[2,3-d]thiophene derivatives with an additional alkyl-thiophene core: synthesis, characterization, and p-type thin film transistor performance
Source: Royal Society of Chemistry journal article supplement (doi:10.1039/d2nj01635d), 2022-01-01
Supplement: d2nj01635d1.pdf [file d2nj01635d1.pdf]

## Supporting Information

### Novel Benzo[*b*]thieno[2,3-*d*]thiophene Derivatives with Additional Alkyl-Thiophene Core: Synthesis, Characterization, and p-Type Thin Film Transistor Performance

Soyoon Park <sup>1,†</sup>, Soomin Ryu <sup>2,†</sup>, Dongil Ho <sup>1</sup>, Wookil Chae <sup>3</sup>, Taeshik Earmme <sup>3</sup>, Choongik Kim<sup>1,\*</sup> and SungYong Seo <sup>2,4\*</sup>

<sup>1</sup> Department of Chemical and Biomolecular Engineering, 35 Baekbeom-ro, Mapo-gu, Sogang University, Seoul 04107, Korea

<sup>2</sup> Department of Smart Green Technology Engineering, Pukyong National University, Busan 48513, Korea

<sup>3</sup> Department of Chemical Engineering, Hongik University, 94 Wausan-ro, Mapo-gu, Seoul 04066, Republic of Korea

<sup>4</sup> Department of Chemistry, Pukyong National University, Busan 48513, Korea

§ *These* authors contributed equally to this work.

#### \* Corresponding authors

\*E-mail: choongik@sogang.ac.kr, syseo@pknu.ac.kr

Keywords: organic thin-film transistor; solution process; solution shearing; benzo[*b*]thieno[2,3-*d*]thiophene; hole mobility

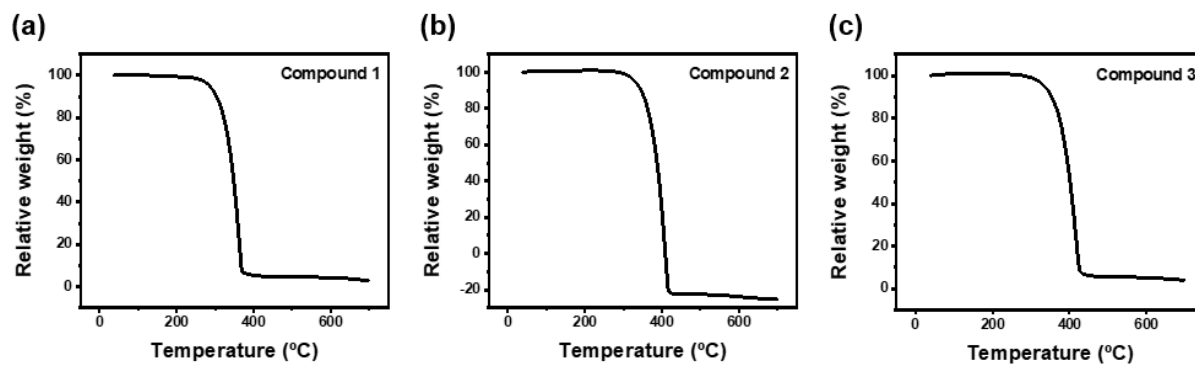

**Fig. S1.** Thermogravimetric analysis (TGA) of newly synthesized BTT-derivatives, (a) compound **1**, (b) compound **2**, and (c) compound **3**.

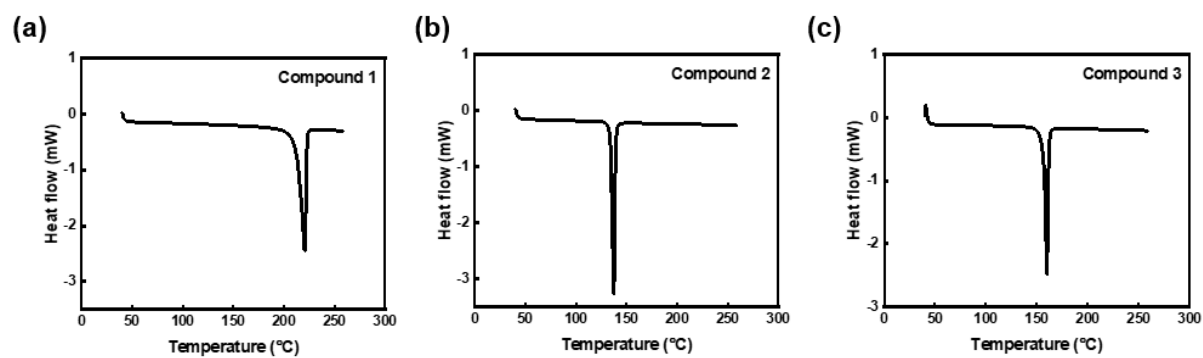

**Fig. S2.** Differential scanning calorimetry (DSC) analysis of synthesized BTT-derivatives, (a) compound **1**, (b) compound **2**, and (c) compound **3**.

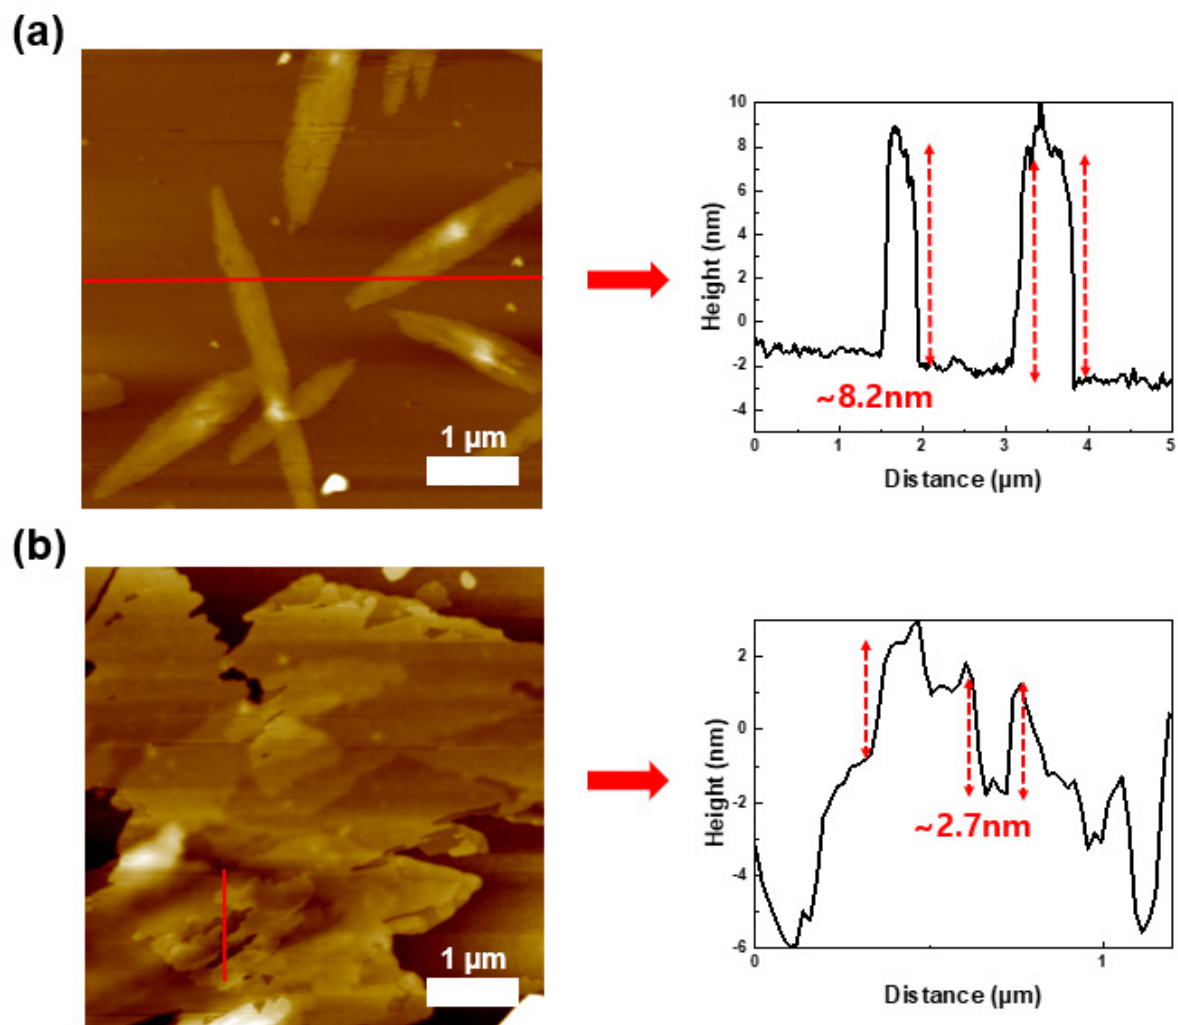

**Fig. S3.** AFM topographic images and corresponding step-height profiles for OTFT films of synthesized BTT-derivatives, (a) compound **1** and (b) compound **3** (area size 5 μm × 5 μm).

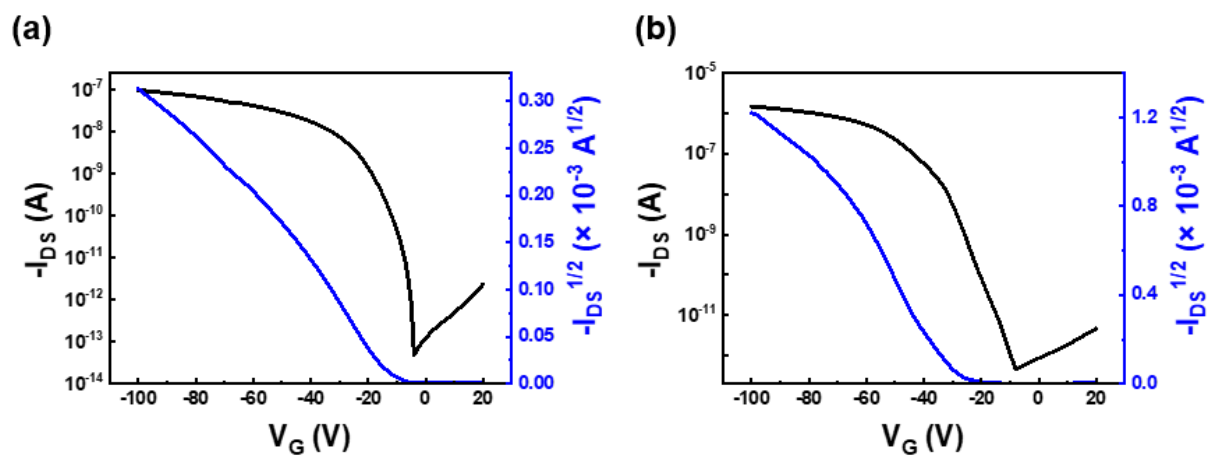

**Fig. S4.** Representative transfer curves of OTFTs of (a) compound **1** and (b) compound **3** in toluene solution.
